# Supplementary material for: Critical Threshold of 70 mol% CO2 Concentration for Economically Viable Geological Storage from Direct Air Capture (DAC)
Source: Research Square preprint supplement (doi:10.21203/rs.3.rs-6213195/v1), 2025-04-24
Supplement: Supplementary file 1 [file e5ef869ba49b9fc5de1e36d6.pdf]

1 Support Information

2 Critical Threshold of 70 mol% CO<sub>2</sub> Concentration for  
3 Economically Viable Geological Storage from Direct  
4 Air Capture (DAC)

5

6 *Le Zhang, Yunfeng Liang\*, Arata Kioka and Takeshi Tsuji\**

7 *Department of Systems Innovation, School of Engineering, The University of Tokyo,*

8 *Tokyo 113-8656, Japan*

9

10 \*Corresponding author

11 E-mail: [liang@sys.t.u-tokyo.ac.jp](mailto:liang@sys.t.u-tokyo.ac.jp) (Y. Liang)

12 E-mail: [tsuji@sys.t.u-tokyo.ac.jp](mailto:tsuji@sys.t.u-tokyo.ac.jp) (T. Tsuji)

13

## 14 **Method**

### 15 **Temperature and Pressure Range**

16 This work selected 6 well-known CCS projects worldwide. The CarbFix project is a model for  
17 CO<sub>2</sub> mineralization research. Reportedly, the injected CO<sub>2</sub> reacts with basalt, achieving permanent  
18 disposal within just two years<sup>1,2</sup>. The Cranfield project, located in Mississippi, USA, features high  
19 temperature and pressure conditions.<sup>3</sup> Sleipner<sup>4-6</sup> and Decatur<sup>7,8</sup> are among the world's earliest  
20 CCS projects, whose designs and processes have served as references for many subsequent  
21 projects. Nagaoka is the first Japanese pilot project for CO<sub>2</sub> geological storage<sup>9,10</sup>. The China  
22 Offshore project is one of the country's latest CCS initiatives, with significant storage potential<sup>11</sup>.

23  
24

Table S1 Typical CO<sub>2</sub> Storage Site Worldwide

| Field Project and Location | Temperature (°C) | Pressure (Bar) |
|----------------------------|------------------|----------------|
| CarbFix, Iceland           | 20 - 33          | ~ 60           |
| Cranfield, USA             | 120              | 324            |
| Nagaoka, Japan             | 48               | 108            |
| Sleipner, Norway           | 45               | 100            |
| Decatur IBDP, USA          | 50               | 221            |
| China Offshore, China      | ~90              | 254            |

25  
26

## 27 Force Fields

28 The field force used for CO<sub>2</sub>, N<sub>2</sub>, and O<sub>2</sub> was from TraPPE-small (Transferable Potential for Phase  
29 Equilibria), which is built to calculate small but vital molecules by the University of Minnesota<sup>12,13</sup>.  
30 These force fields were used by various studies, showing pretty good agreement in density and  
31 vapor-liquid equilibria calculation<sup>14-16</sup>. All Molecules built in TraPPE-small force field have rigid  
32 structures (i.e., no bonded potential) and do not otherwise fit into another TraPPE family. Detailed  
33 non-bonded parameters and partial charge can be found in Table S2. The Lorentz–Berthelot  
34 combination rules were employed to calculate the interactions among molecules. The density  
35 calculation uses the isothermal–isobaric (NPT) ensemble to validate the selected force fields for  
36 impurities.

37 Table S2 The Non-bond Parameters for Molecules

| Molecules       | Atom | $\sigma(nm)$ | $\epsilon(KJ/mol)$ | $q(e)$  | Critical Temperature(K)<br>TraPPE-model / NIST | Critical Pressure (Bar)<br>TraPPE-model / NIST |
|-----------------|------|--------------|--------------------|---------|------------------------------------------------|------------------------------------------------|
| CO <sub>2</sub> | C    | 0.2800       | 0.2244918          | 0.7000  | 306.2 / 304.21                                 | 77.7 / 73.843                                  |
|                 | O    | 0.3050       | 0.6568464          | -0.3500 |                                                |                                                |
| N <sub>2</sub>  | N    | 0.3310       | 0.2993040          | -0.4820 | 126.5 / 126.19                                 | 34.6 / 33.98                                   |
|                 | MW   | 0.0000       | 0.0000000          | 0.9640  |                                                |                                                |
| O <sub>2</sub>  | O    | 0.3020       | 0.4073860          | -0.113  | 153.5 / 154.58                                 | 50.63 / 51.1                                   |
|                 | MW   | 0.0000       | 0.0000000          | 0.226   |                                                |                                                |

38

39

## 40 **Simulation Details**

41 All Molecule Dynamics (MD) simulations were performed with GROMACS package v2024.4<sup>17</sup>.  
42 The particle mesh Ewald (PME) method was applied for both long-range electrostatic and  
43 Lennard-Jones interactions with a Fourier spacing of 0.12 nm and a cutoff distance of 1.4 nm<sup>18,19</sup>.  
44 The bonds were constrained using a linear constraint solver (LINCS) algorithm with bond  
45 constraints added<sup>20</sup>. Additionally, 3-D periodic boundary conditions (PBC) were applied to all  
46 simulations. The ratio of N<sub>2</sub> to O<sub>2</sub> in the simulation is kept at 4:1. Each system contains 1,380  
47 molecules. In all simulations, 3-D periodic boundary conditions (PBC) were applied to all  
48 simulations. The ratio of N<sub>2</sub> to O<sub>2</sub> in the simulation is kept at 4:1. Each system contains 1,380  
49 molecules. For systems with different CO<sub>2</sub> concentrations, corresponding amounts of CO<sub>2</sub> were  
50 replaced with N<sub>2</sub> and O<sub>2</sub> in the same ratio. For example, under the condition of 50 mol%, the  
51 system contains 690 CO<sub>2</sub> molecules, 552 N<sub>2</sub> molecules, and 138 O<sub>2</sub> molecules. A total of seven  
52 typical cases are considered: 100% (pure CO<sub>2</sub>), 95mol%, 90mol%, 80mol%, 70mol%, 60mol%,  
53 and 50mol%. A 10 × 10 × 10 nm<sup>3</sup> box was prepared for holding molecules at the beginning stage.  
54 The system firstly relaxed through steepest descent algorithm (Energy minimization). After energy  
55 minimization, 1-ns NPT simulation with velocity-rescaling thermostat<sup>21</sup> and Berendsen barostat<sup>22</sup>  
56 was performed for equilibrium purpose. After that, 5-ns NPT simulation with Nosé-Hoover  
57 thermostat and an isotropic Parrinello-Rahman barostat was performed for production<sup>23-25</sup>. Time  
58 step was set as 1 fs, so there are 1,000,000 steps for equilibrium and 5,000,000 steps for production  
59 runs. Only the last 2 million steps of the final 5 million production simulation steps were used for  
60 result analysis, thereby avoiding any early-stage disequilibrium.

61

## 62 Simulation Validation

63 The density of pure CO<sub>2</sub>, N<sub>2</sub>, and O<sub>2</sub> are calculated to validate the force field and computational  
64 method. Validation cases were conducted at a constant temperature of 325.65 K and varying  
65 pressures. The simulation results, presented in Fig. S1, show a strong agreement with NIST  
66 WebBook data<sup>26</sup>, with an average error of less than 1%. The results confirm the reliability of our  
67 simulation methodology and force field for accurate density predictions.

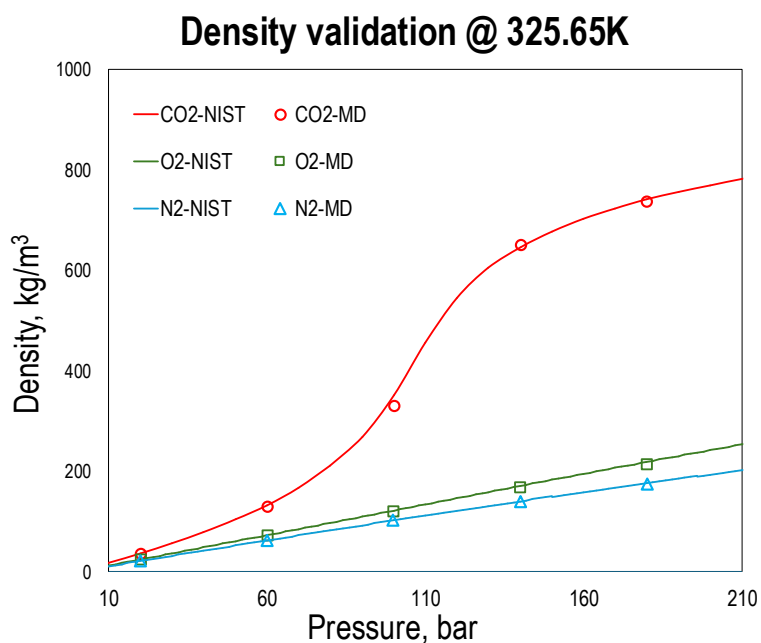

68 Fig. S1 Density calculation validation results for pure molecules.  
69  
70

## 71 **Radial Distribution Function (RDF) and Coordination Number** 72 **Analysis**

73 Besides the Lennard-Jones (LJ) potential and Coulomb potential investigation, we further analyzed  
74 the radial distribution functions (RDF) and coordination numbers (CN) for CO<sub>2</sub>-CO<sub>2</sub>, N<sub>2</sub>-N<sub>2</sub>, and  
75 CO<sub>2</sub>-N<sub>2</sub> pairs within the system. Fig. S1 a), d), and g) present the RDF distributions for CO<sub>2</sub>-CO<sub>2</sub>,  
76 N<sub>2</sub>-N<sub>2</sub>, and CO<sub>2</sub>-N<sub>2</sub>, respectively. The RDF peak values for different CO<sub>2</sub> concentrations were  
77 plotted against temperature, resulting in the curves shown in Fig. S1 b), e), and h). The CN values  
78 corresponding to the RDF valley following the first peak were also calculated and are presented in  
79 Fig. S1 c), f), and i). The peak data are influenced by concentration, leading to instability. For  
80 instance, Fig. S1 e) shows significant fluctuations in the RDF peak of N<sub>2</sub>-N<sub>2</sub> under 90% CO<sub>2</sub>  
81 conditions, while the CO<sub>2</sub>-CO<sub>2</sub> data remain stable. The CN trends displayed in Fig. S1 c), f), and  
82 i) reveal that CO<sub>2</sub>-CO<sub>2</sub> has a larger slope compared to N<sub>2</sub>-N<sub>2</sub> and CO<sub>2</sub>-N<sub>2</sub>, which show relatively  
83 minor changes in slope. A similar trend is observed in the first peak height plots, where the slope  
84 changes for N<sub>2</sub>-N<sub>2</sub> and CO<sub>2</sub>-N<sub>2</sub> are less pronounced. Notably, in the first peak height distribution  
85 of CO<sub>2</sub>-CO<sub>2</sub>, we observed a slope change similar to that in. The difference in values between the  
86 right and left sides of the plot is approximately 40.2%, consistent with the previously observed  
87 trends in density distribution and LJ potential.

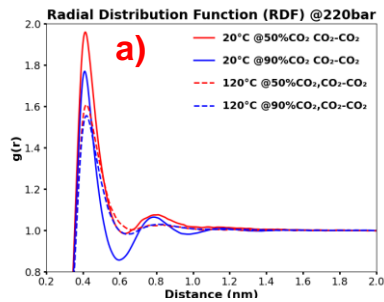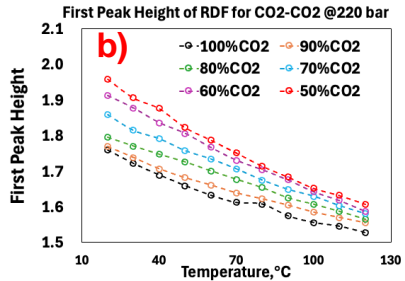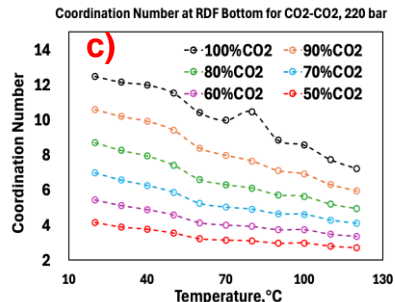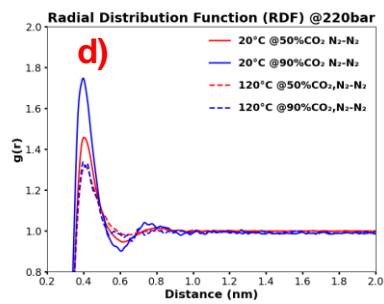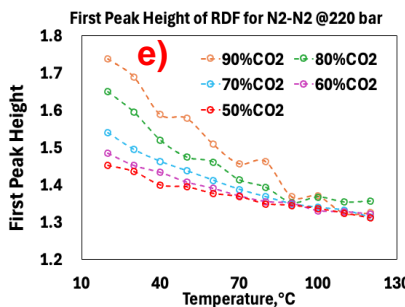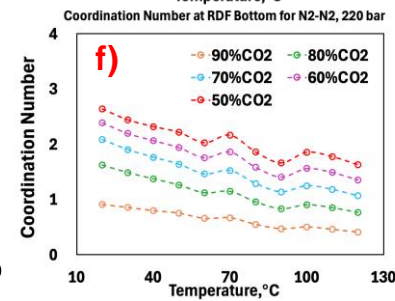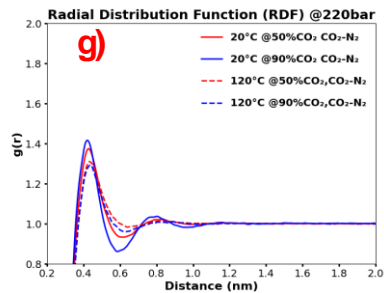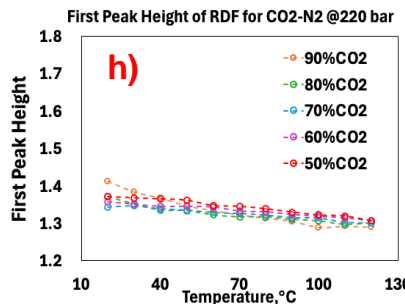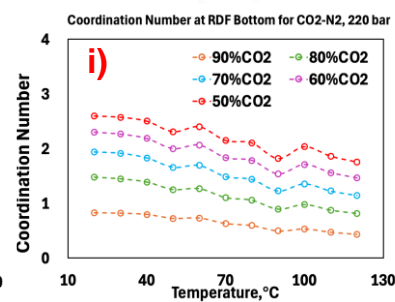

88  
89  
90  
91

Fig. S1 Radial distribution function (RDF), RDF peak value, and coordination number for CO<sub>2</sub>-CO<sub>2</sub>, N<sub>2</sub>-N<sub>2</sub>, and CO<sub>2</sub>-N<sub>2</sub>.

## 92 Temperature and Pressure Gradient Profile

93 A comprehensive investigation of pressure and temperature was conducted to establish the T-P  
 94 relation, as shown in Table S3. Saline aquifers, conventional oil and gas reservoirs, shale, and coal  
 95 beds are considered potential storage formations. In both sandstone and shale reservoirs, the  
 96 common pressure gradient typically ranges between 90–120 bar/km, However, shale reservoirs in  
 97 China exhibit higher pressure gradients, likely due to their greater burial depths. The temperature  
 98 gradient range was not directly derived from the table data; instead, it was determined based on  
 99 the global temperature distribution of sedimentary basins, making it a more representative  
 100 selection. The formulas for pressure gradient and temperature gradient are as follows:

$$101 \quad T - T_0 = K_T \times D \quad (1)$$

$$102 \quad P = K_P \times D \quad (2)$$

103 where  $T_0$  is the initial temperature (°C),  $K_T$  is the temperature gradient (°C/km),  $K_P$  is the pressure  
 104 gradient (bar/km), and  $D$  is the depth (km). P-T relation can be obtained by combining these two  
 105 formulas.

106 Table S3 Comparison of the Temperature and Pressure Feature for CO<sub>2</sub> Storage Formation

| Project and/or Location | Type of Reservoir             | Water Depth, m | Temperature gradient, °C/km | Pressure gradient, bar/km | Ref. |
|-------------------------|-------------------------------|----------------|-----------------------------|---------------------------|------|
| Sleipner, Norway        | The Utsira, Sandstone         | 90             | 33                          | 100~110                   | 4,5  |
| Decatur, USA            | Mt. Simon, Sandstone          | Onshore        | 18.2                        | ~103                      | 27,7 |
| Nagaoka, Japan          | The Haizume, Sandstone        | Onshore        | 33                          | 98                        | 9,10 |
| Tomakomae, Japan        | Volcaniclastic rocks and sand | 20~40          | ~33                         | 92~120                    | 28   |
| In Salah, Algeria       | Carboniferous Sandstone       | Onshore        | ~32                         | ~100                      | 29   |
| Louisiana, USA          | The Haynesville Shale         | Onshore        | 25~33                       | 103~109                   | 30   |
| South China             | The Longmaxi Shale            | Onshore        | ~33                         | 150                       | 31   |
| N/A                     | A typical sedimentary basin   | N/A            | 30                          | 150                       | 32   |
| Texas, USA              | The Barnett Shale             | Onshore        | ~33                         | ~100                      | 33   |
| N/A                     | A natural Coal Seam           | N/A            | 25                          | 150                       | 34   |

107



## 108 **References**

- 109 1. Matter, J. M. *et al.* Rapid carbon mineralization for permanent disposal of anthropogenic carbon  
110 dioxide emissions. *Science* **352**, 1312–1314 (2016).
- 111 2. Zhang, S. & DePaolo, D. J. Rates of CO<sub>2</sub> Mineralization in Geological Carbon Storage. *Acc.*  
112 *Chem. Res.* **50**, 2075–2084 (2017).
- 113 3. Lu, J. *et al.* CO<sub>2</sub>–rock–brine interactions in Lower Tuscaloosa Formation at Cranfield CO<sub>2</sub>  
114 sequestration site, Mississippi, U.S.A. *Chem. Geology* **291**, 269–277 (2012).
- 115 4. Arts, R. *et al.* Monitoring of CO<sub>2</sub> injected at Sleipner using time-lapse seismic data. *Energy* **29**,  
116 1383–1392 (2004).
- 117 5. Bickle, M., Chadwick, A., Huppert, H. E., Hallworth, M. & Lyle, S. Modelling carbon dioxide  
118 accumulation at Sleipner: Implications for underground carbon storage. *Earth Planet. Sci. Lett.*  
119 **255**, 164–176 (2007).
- 120 6. Zweigel, P., Arts, R., Lothe, A. E. & Lindeberg, E. B. G. Reservoir geology of the Utsira  
121 Formation at the first industrial-scale underground CO<sub>2</sub> storage site (Sleipner area, North Sea).  
122 *Geological Society, London, Special Publication* **233**, 165–180 (2004).
- 123 7. Finley, R. J. An overview of the Illinois Basin – Decatur Project. *Greenh. Gases* **4**, 571–579  
124 (2014).
- 125 8. Berger, P. M., Yoksoolian, L., Freiburg, J. T., Butler, S. K. & Roy, W. R. Carbon sequestration  
126 at the Illinois Basin-Decatur Project: experimental results and geochemical simulations of  
127 storage. *Environ. Earth Sci* **78**, 646 (2019).
- 128 9. Sato, K. *et al.* Monitoring and simulation studies for assessing macro- and meso-scale migration  
129 of CO<sub>2</sub> sequestered in an onshore aquifer: Experiences from the Nagaoka pilot site, Japan. *Int.*  
130 *J. Greenhouse Gas Control* **5**, 125–137 (2011).

- 131 10. Mito, S., Xue, Z. & Ohsumi, T. Case study of geochemical reactions at the Nagaoka CO<sub>2</sub>  
132 injection site, Japan. *Int. J. Greenhouse Gas Control* **2**, 309–318 (2008).
- 133 11. Li, J. *et al.* Site-Level Carbon Storage Potential Estimation in Offshore China. in *SPE*  
134 *Symposium and Exhibition - Production Enhancement and Cost Optimisation* D021S007R001  
135 (SPE, Kuala Lumpur, Malaysia, 2024). doi:10.2118/220657-MS.
- 136 12. Potoff, J. J. & Siepmann, J. I. Vapor–liquid equilibria of mixtures containing alkanes, carbon  
137 dioxide, and nitrogen. *AIChE J.* **47**, 1676–1682 (2001).
- 138 13. Zhang, L. & Siepmann, J. Ilja. Direct calculation of Henry’s law constants from Gibbs  
139 ensemble Monte Carlo simulations: nitrogen, oxygen, carbon dioxide and methane in ethanol.  
140 *Theor Chem. Acc.* **115**, 391–397 (2006).
- 141 14. Aimoli, C. G., Maginn, E. J. & Abreu, C. R. A. Transport properties of carbon dioxide and  
142 methane from molecular dynamics simulations. *J. Chem. Phys.* **141**, 134101 (2014).
- 143 15. Makimura, D. *et al.* Application of Molecular Simulations to CO<sub>2</sub>-Enhanced Oil Recovery:  
144 Phase Equilibria and Interfacial Phenomena. *SPE J.* **18**, 319–330 (2013).
- 145 16. Yang, X., Feng, Y., Jin, J., Liu, Y. & Cao, B. Molecular dynamics simulation and theoretical  
146 study on heat capacities of supercritical H<sub>2</sub>O/CO<sub>2</sub> mixtures. *J. Mol. Liquids* **299**, 112133  
147 (2020).
- 148 17. Van Der Spoel, D. *et al.* GROMACS: Fast, flexible, and free. *J. Comput. Chem.* **26**, 1701–  
149 1718 (2005).
- 150 18. Petersen, H. G. Accuracy and efficiency of the particle mesh Ewald method. *J. Chem. Phys.*  
151 **103**, 3668–3679 (1995).

- 152 19. Wennberg, C. L., Murtola, T., Hess, B. & Lindahl, E. Lennard-Jones Lattice Summation in  
153 Bilayer Simulations Has Critical Effects on Surface Tension and Lipid Properties. *J. Chem.*  
154 *Theory Comput.* **9**, 3527–3537 (2013).
- 155 20. Hess, B., Bekker, H., Berendsen, H. J. C. & Fraaije, J. G. E. M. LINCS: A linear constraint  
156 solver for molecular simulations. *J. Comput. Chem.* **18**, 1463–1472 (1997).
- 157 21. Berendsen, H. J. C., Postma, J. P. M., Van Gunsteren, W. F., DiNola, A. & Haak, J. R.  
158 Molecular dynamics with coupling to an external bath. *J. Chem. Phys.* **81**, 3684–3690 (1984).
- 159 22. Bussi, G., Donadio, D. & Parrinello, M. Canonical sampling through velocity rescaling. *J.*  
160 *Chem. Phys.* **126**, 014101 (2007).
- 161 23. Hoover, W. G. Canonical dynamics: Equilibrium phase-space distributions. *Phys. Rev. A* **31**,  
162 1695–1697 (1985).
- 163 24. Parrinello, M. & Rahman, A. Strain fluctuations and elastic constants. *J. Chem. Phys.* **76**,  
164 2662–2666 (1982).
- 165 25. Nosé, S. A molecular dynamics method for simulations in the canonical ensemble. *Mol. Phys.*  
166 **100**, 191–198 (2002).
- 167 26. Lemmon, E. W. Thermophysical Properties of Fluids. *NIST* (2009).
- 168 27. Senel, O., Will, R. & Butsch, R. J. Integrated reservoir modeling at the Illinois Basin – Decatur  
169 Project. *Greenh. Gases* **4**, 662–684 (2014).
- 170 28. Tanaka, Y. *et al.* Tomakomai CCS Demonstration Project of Japan, CO<sub>2</sub> Injection in Process.  
171 *Energy Procedia* **114**, 5836–5846 (2017).
- 172 29. Rutqvist, J., Vasco, D. W. & Myer, L. Coupled reservoir-geomechanical analysis of CO<sub>2</sub>  
173 injection and ground deformations at In Salah, Algeria. *Int. J. Greenhouse Gas Control* **4**, 225–  
174 230 (2010).

- 175 30. Nunn, J. A. Burial and Thermal History of The Haynesville Shale: Implication For  
176 Overpressure, Gas Generation, and Natural Hydrofracture. *Geol. Soc. (GCAGS) J.* v.1, 2012.
- 177 31. Pan, L., Xiao, X., Tian, H., Zhou, Q. & Cheng, P. Geological models of gas in place of the  
178 Longmaxi shale in Southeast Chongqing, South China. *Mar. Petrol. Geology* 73, 433–444  
179 (2016).
- 180 32. Zhang, H. & Cao, D. Molecular simulation of displacement of shale gas by carbon dioxide at  
181 different geological depths. *Chem. Eng. Sci.* **156**, 121–127 (2016).
- 182 33. Tang, X., Ripepi, N., Stadie, N. P., Yu, L. & Hall, M. R. A dual-site Langmuir equation for  
183 accurate estimation of high pressure deep shale gas resources. *Fuel* **185**, 10–17 (2016).
- 184 34. Li, X., Sun, X., Walters, C. C. & Zhang, T. H<sub>2</sub>, CH<sub>4</sub> and CO<sub>2</sub> adsorption on Cameo coal:  
185 Insights into the role of cushion gas in hydrogen geological storage. *Int. J. Hydro. Energy* **50**,  
186 879–892 (2024).
- 187
- 188
